# Supplementary material for: Insights into the modulation mechanisms of multiple active sites in a conjugated small molecule towards organic cathode capacity from first-principles
Source: Royal Society of Chemistry journal article supplement (doi:10.1039/d4qi00547c), 2024-01-01
Supplement: d4qi00547c1.pdf [file d4qi00547c1.pdf]

# Insights into the Modulation Mechanisms of Multi-active Sites in Conjugated Small-molecule for Organic Cathodes Capacity from First-principles

Zhaopeng Sun, Hao Tian, Meng Zhang, Yi Zhang, Zhiping Li, Weiwei Huang

## Contents

### 1. Synthesis of 3BQ.

**Fig. S1** Synthesis routes of 3BQ.

### 2. Material characterization of 3BQ.

**Fig. S2** The FTIR spectrum of 3BQ.

**Fig. S3** The  $^1\text{H}$  NMR spectrum of 3BQ.

### 3. The theoretical calculations about 3BQ.

**Table. S1** Lattice parameters and atomic coordinates of the simulated bilayer 3BQ.

**Table. S2** Adsorption energies of various possible Na-adsorption sites on molecules in the upper layers of the 3BQ crystal.

**Table. S3** Adsorption energies of various possible Na-adsorption sites on molecules in the lower layers of the 3BQ crystal.

**Fig. S4** Front and side views of a single  $\text{Na}^+$  adsorbed at the monolayer 3BQ redox center.

**Fig. S5** Front and side views of a single  $\text{Na}^+$  adsorbed on the C=O group on the surface of monolayer 3BQ.

**Fig. S6** Front and side views of a single  $\text{Na}^+$  adsorbed on the  $\text{C}=\text{O}$  group between monolayer 3BQ layers.

**Fig. S7** Average  $E_{\text{ad}}$  of individual  $\text{Na}^+$  corresponding to multiple  $\text{Na}^+$  adsorbed between redox sites and adsorbed on the  $\text{C}=\text{O}$  group of 3BQ-3Na.

**Fig. S8** Front and side views of a single  $\text{Li}^+$  adsorbed at the monolayer 3BQ redox center.

**Fig. S9**  $E_{\text{ad}}$  of potential 2nd Li-adsorption sites on bilayer 3BQ.

**Fig. S10** Average  $E_{\text{ad}}$  of individual  $\text{Li}^+$  corresponding to multiple  $\text{Li}^+$  adsorbed between redox sites and adsorbed on the  $\text{C}=\text{O}$  group of 3BQ-3 Li.

#### **4. Electrochemical measurements.**

**Fig. S11** The 1st discharge curve of conductive carbon at the current density of  $100 \text{ mA g}^{-1}$ .

**Fig. S12** Cycling stability of 3BQ cathode in NIBs.

#### **5. References**

## 1. Synthesis of 3BQ.

All reagents used in this experiment have been purchased directly without additional purification. As shown in Fig. S1, 3BQ was synthesized by the reaction with Cyclohexanehexone octahydrate ( $C_6O_6 \cdot 8H_2O$ ) and 2,3-Diamino-1,4-naphthoquinone (DANQ).<sup>1</sup> Initially,  $C_6O_6 \cdot 8H_2O$  (3.0 g, 9.6 mmol) (1.5g, 4.8 mmol) and DANQ (5.4 g, 28.8 mmol) (2.7g 14.4 mmol) were dissolved in acetic acid/ethanol (1:1/vol.) under the protection of  $N_2$  and refluxed for 24 h. The brown suspension was collected by filtration and washed with hot acetic acid, water, and ethanol. After that, it was stirred with 30%  $HNO_3$  at 140 °C for 3 h. Finally, the yellow solid was collected by filtration, washed and dried under a vacuum.

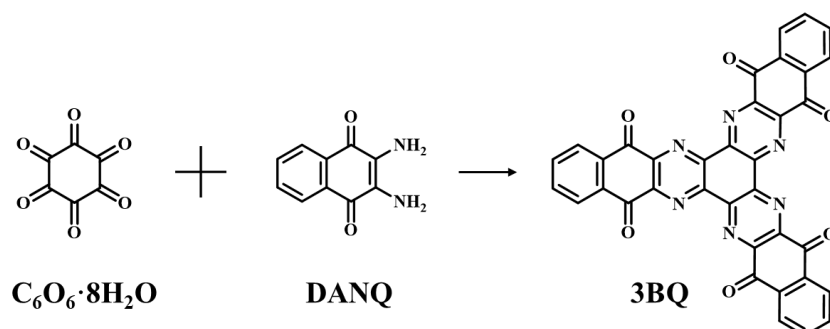

Fig. S1 Synthesis routes of 3BQ.

## 2. Material characterization of 3BQ.

As shown in Fig. S2 and Fig. S3, the structure of 3BQ was detected by Fourier transforms infrared spectroscopy and  $^1\text{H}$  nuclear magnetic resonance.

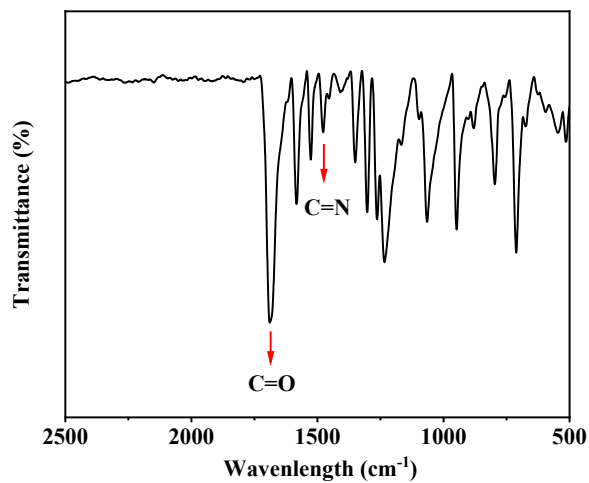

Fig. S2 The FTIR spectrum of 3BQ.

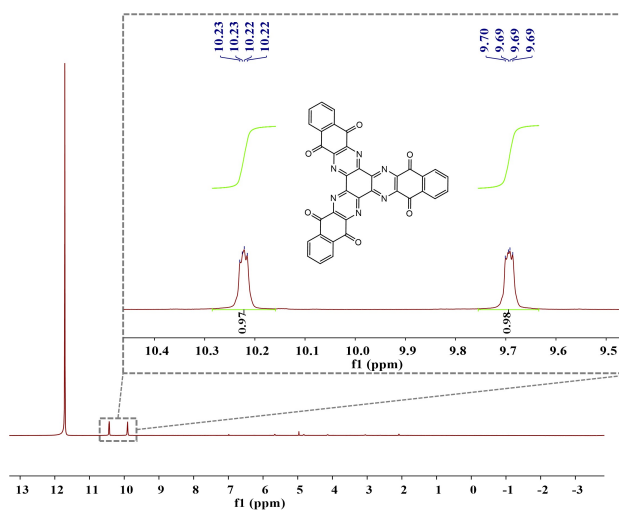

Fig. S3 The  $^1\text{H}$  NMR spectrum of 3BQ.

### 3. The theoretical calculations about 3BQ.

**Table. S1** Lattice parameters and atomic coordinates of the simulated bilayer 3BQ.

| a=15.4581 Å, b=15.4587 Å, c=6.5173 Å      |         |         |         |        |         |         |         |
|-------------------------------------------|---------|---------|---------|--------|---------|---------|---------|
| $\alpha=\gamma=90^\circ, \beta=120^\circ$ |         |         |         |        |         |         |         |
| Symbol                                    | X       | Y       | Z       | Symbol | X       | Y       | Z       |
| C1                                        | 0.89243 | 0.94528 | 0.72339 | C61    | 0.42518 | 0.47779 | 0.72255 |
| C2                                        | 0.05477 | 0.94722 | 0.72338 | C62    | 0.52196 | 0.94732 | 0.72256 |
| C3                                        | 0.05298 | 0.10770 | 0.72340 | C63    | 0.05265 | 0.57469 | 0.72256 |
| C4                                        | 0.94570 | 0.89231 | 0.72308 | C64    | 0.47723 | 0.42554 | 0.72315 |
| C5                                        | 0.94665 | 0.05435 | 0.72309 | C65    | 0.94828 | 0.52254 | 0.72315 |
| C6                                        | 0.10784 | 0.05354 | 0.72309 | C66    | 0.57433 | 0.05168 | 0.72316 |
| C7                                        | 0.77426 | 0.38807 | 0.22628 | C67    | 0.24151 | 0.85558 | 0.22710 |
| C8                                        | 0.61188 | 0.38610 | 0.22626 | C68    | 0.14470 | 0.38602 | 0.22711 |
| C9                                        | 0.61369 | 0.22560 | 0.22624 | C69    | 0.61402 | 0.75862 | 0.22711 |
| C10                                       | 0.72097 | 0.44104 | 0.22660 | C70    | 0.18948 | 0.90784 | 0.22650 |
| C11                                       | 0.72003 | 0.27898 | 0.22658 | C71    | 0.71838 | 0.81075 | 0.22652 |
| C12                                       | 0.55881 | 0.27976 | 0.22653 | C72    | 0.09231 | 0.28166 | 0.22651 |
| C13                                       | 0.74569 | 0.79792 | 0.72405 | H1     | 0.43811 | 0.62377 | 0.72235 |
| C14                                       | 0.20205 | 0.94785 | 0.72402 | H2     | 0.37587 | 0.81423 | 0.72237 |
| C15                                       | 0.05235 | 0.25437 | 0.72407 | H3     | 0.18579 | 0.56195 | 0.72238 |
| C16                                       | 0.79853 | 0.74513 | 0.72276 | H4     | 0.62301 | 0.43776 | 0.72259 |
| C17                                       | 0.94665 | 0.20144 | 0.72278 | H5     | 0.81466 | 0.37667 | 0.72259 |
| C18                                       | 0.25495 | 0.05353 | 0.72273 | H6     | 0.56232 | 0.18534 | 0.72259 |
| C19                                       | 0.92100 | 0.53548 | 0.22573 | H7     | 0.22856 | 0.70958 | 0.22734 |
| C20                                       | 0.46456 | 0.38545 | 0.22570 | H8     | 0.29081 | 0.51911 | 0.22732 |
| C21                                       | 0.61436 | 0.07894 | 0.22570 | H9     | 0.48088 | 0.77138 | 0.22734 |
| C22                                       | 0.86813 | 0.58826 | 0.22697 | H10    | 0.04371 | 0.89566 | 0.22702 |
| C23                                       | 0.72007 | 0.13189 | 0.22695 | H11    | 0.85203 | 0.95661 | 0.22703 |
| C24                                       | 0.41167 | 0.27975 | 0.22693 | H12    | 0.10426 | 0.14796 | 0.22699 |
| C25                                       | 0.63366 | 0.74384 | 0.72516 | H13    | 0.34397 | 0.43708 | 0.72242 |
| C26                                       | 0.25601 | 0.88984 | 0.72515 | H14    | 0.56258 | 0.90677 | 0.72244 |
| C27                                       | 0.11028 | 0.36640 | 0.72518 | H15    | 0.09316 | 0.65590 | 0.72243 |
| C28                                       | 0.74390 | 0.63311 | 0.72172 | H16    | 0.43626 | 0.34431 | 0.72341 |
| C29                                       | 0.88923 | 0.25598 | 0.72172 | H17    | 0.90798 | 0.56343 | 0.72341 |
| C30                                       | 0.36700 | 0.11090 | 0.72167 | H18    | 0.65556 | 0.09194 | 0.72344 |
| C31                                       | 0.03302 | 0.58956 | 0.22464 | H19    | 0.32271 | 0.89628 | 0.22716 |
| C32                                       | 0.41061 | 0.44347 | 0.22460 | H20    | 0.10409 | 0.42657 | 0.22717 |
| C33                                       | 0.55641 | 0.96690 | 0.22462 | H21    | 0.57351 | 0.67741 | 0.22717 |
| C34                                       | 0.92278 | 0.70029 | 0.22785 | H22    | 0.23047 | 0.98907 | 0.22616 |
| C35                                       | 0.77749 | 0.07733 | 0.22787 | H23    | 0.75866 | 0.76984 | 0.22617 |
| C36                                       | 0.29961 | 0.22239 | 0.22783 | H24    | 0.01108 | 0.24143 | 0.22617 |
| C37                                       | 0.58136 | 0.63400 | 0.72314 | N1     | 0.79252 | 0.89706 | 0.72432 |

|     |         |         |         |     |         |         |         |
|-----|---------|---------|---------|-----|---------|---------|---------|
| C38 | 0.36587 | 0.94736 | 0.72313 | N2  | 0.10290 | 0.89550 | 0.72430 |
| C39 | 0.05271 | 0.41862 | 0.72315 | N3  | 0.10469 | 0.20761 | 0.72433 |
| C40 | 0.63411 | 0.58127 | 0.72264 | N4  | 0.89778 | 0.79227 | 0.72266 |
| C41 | 0.94718 | 0.36578 | 0.72266 | N5  | 0.89450 | 0.10219 | 0.72268 |
| C42 | 0.41871 | 0.05288 | 0.72262 | N6  | 0.20789 | 0.10568 | 0.72266 |
| C43 | 0.08533 | 0.69940 | 0.22668 | N7  | 0.87417 | 0.43633 | 0.22539 |
| C44 | 0.30076 | 0.38595 | 0.22666 | N8  | 0.56373 | 0.43779 | 0.22538 |
| C45 | 0.61399 | 0.91469 | 0.22668 | N9  | 0.56201 | 0.12569 | 0.22534 |
| C46 | 0.03258 | 0.75213 | 0.22712 | N10 | 0.76888 | 0.54108 | 0.22699 |
| C47 | 0.71952 | 0.96753 | 0.22714 | N11 | 0.77218 | 0.23114 | 0.22697 |
| C48 | 0.24790 | 0.28042 | 0.22711 | N12 | 0.45874 | 0.22762 | 0.22691 |
| C49 | 0.47705 | 0.58149 | 0.72256 | O1  | 0.58861 | 0.79050 | 0.72818 |
| C50 | 0.41825 | 0.89549 | 0.72258 | O2  | 0.20923 | 0.79807 | 0.72822 |
| C51 | 0.10453 | 0.52293 | 0.72257 | O3  | 0.20206 | 0.41157 | 0.72822 |
| C52 | 0.58100 | 0.47702 | 0.72286 | O4  | 0.79012 | 0.58738 | 0.71999 |
| C53 | 0.89598 | 0.41878 | 0.72286 | O5  | 0.79722 | 0.20969 | 0.71996 |
| C54 | 0.52297 | 0.10403 | 0.72286 | O6  | 0.41289 | 0.20289 | 0.71990 |
| C55 | 0.18964 | 0.75188 | 0.22718 | O7  | 0.07806 | 0.54288 | 0.22162 |
| C56 | 0.24841 | 0.43785 | 0.22716 | O8  | 0.45741 | 0.53523 | 0.22153 |
| C57 | 0.56214 | 0.81038 | 0.22718 | O9  | 0.46463 | 0.92173 | 0.22156 |
| C58 | 0.08570 | 0.85639 | 0.22683 | O10 | 0.87657 | 0.74603 | 0.22917 |
| C59 | 0.77071 | 0.91452 | 0.22685 | O11 | 0.86949 | 0.12361 | 0.22923 |
| C60 | 0.14363 | 0.22928 | 0.22682 | O12 | 0.25371 | 0.13040 | 0.22917 |

The crystallographic data (CCDC 1996183) was obtained free of charge from the Cambridge Crystallographic Data Centre via [www.ccdc.cam.ac.uk/data\\_request/cif](http://www.ccdc.cam.ac.uk/data_request/cif).

**Table. S2** Adsorption energies of various possible Na-adsorption sites on molecules in the upper layers of the 3BQ crystal.

| Na-adsorption site number | 1     | 2     | 3     | 4     | 5     | 6     |
|---------------------------|-------|-------|-------|-------|-------|-------|
| Adsorption energy (eV)    | -2.75 | -2.74 | -2.75 | -2.74 | -2.74 | -2.74 |
| Na-adsorption site number | 7     | 8     | 9     | 10    | 11    | 12    |
| Adsorption energy (eV)    | -1.62 | -1.63 | -1.61 | -1.53 | -1.51 | -1.52 |

**Table. S3** Adsorption energies of various possible Na-adsorption sites on molecules in the lower layers of the 3BQ crystal.

| Na-adsorption site number | 13    | 14    | 15    | 16    | 17    | 18    |
|---------------------------|-------|-------|-------|-------|-------|-------|
| Adsorption energy (eV)    | -2.75 | -2.77 | -2.76 | -2.78 | -2.81 | -2.78 |
| Na-adsorption site number | 19    | 20    | 21    | 22    | 23    | 24    |
| Adsorption energy (eV)    | -2.35 | -2.37 | -2.33 | -1.46 | -1.60 | -1.47 |

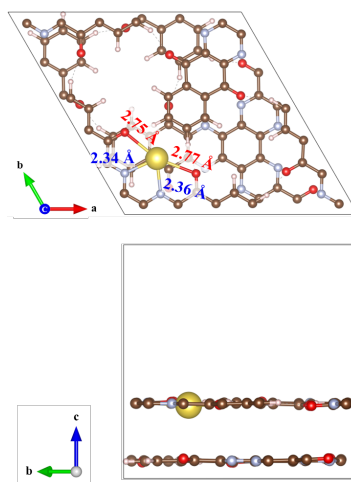

**Fig. S4** Front and side views of a single  $\text{Na}^+$  adsorbed at the monolayer 3BQ redox center.

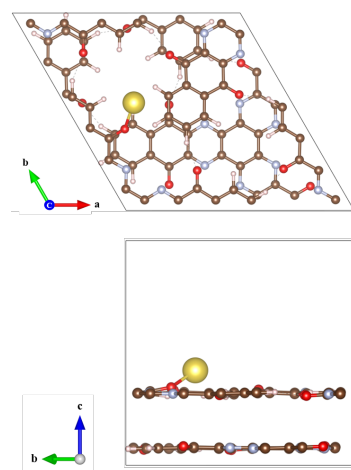

**Fig. S5** Front and side views of a single  $\text{Na}^+$  adsorbed on the  $\text{C}=\text{O}$  group on the surface of monolayer 3BQ.

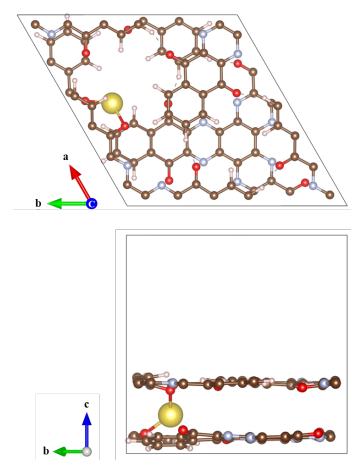

**Fig. S6** Front and side views of a single  $\text{Na}^+$  adsorbed on the  $\text{C}=\text{O}$  group between monolayer 3BQ layers.

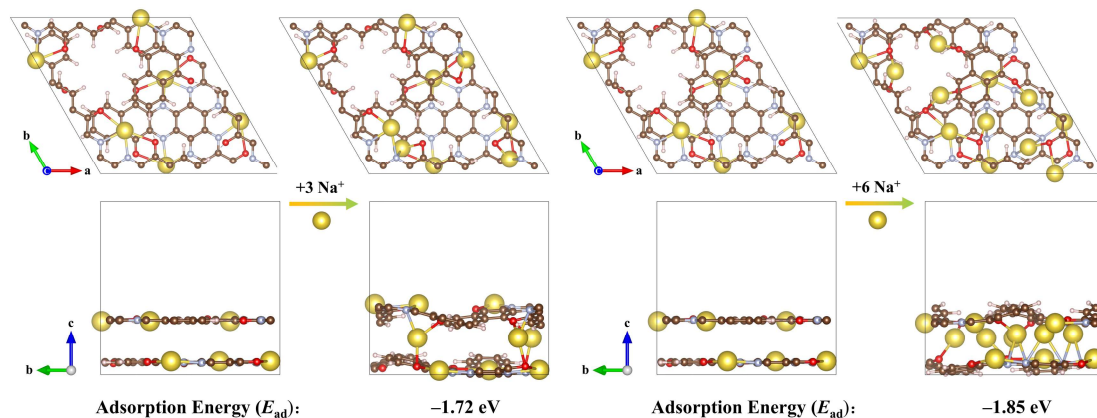

**Fig. S7** Average  $E_{ad}$  of individual  $\text{Na}^+$  corresponding to multiple  $\text{Na}^+$  adsorbed between redox sites and adsorbed on the  $\text{C}=\text{O}$  group of 3BQ-3Na.

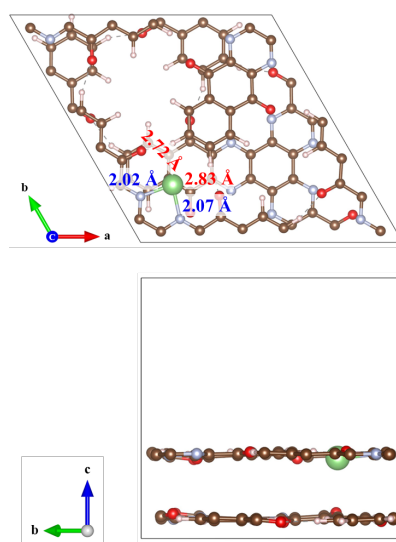

**Fig. S8** Front and side views of a single  $\text{Li}^+$  adsorbed at the monolayer 3BQ redox center.

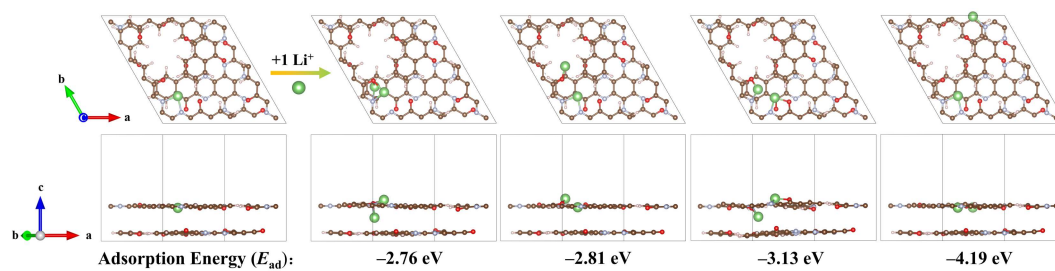

**Fig. S9**  $E_{ad}$  of potential 2nd Li-adsorption sites on bilayer 3BQ.



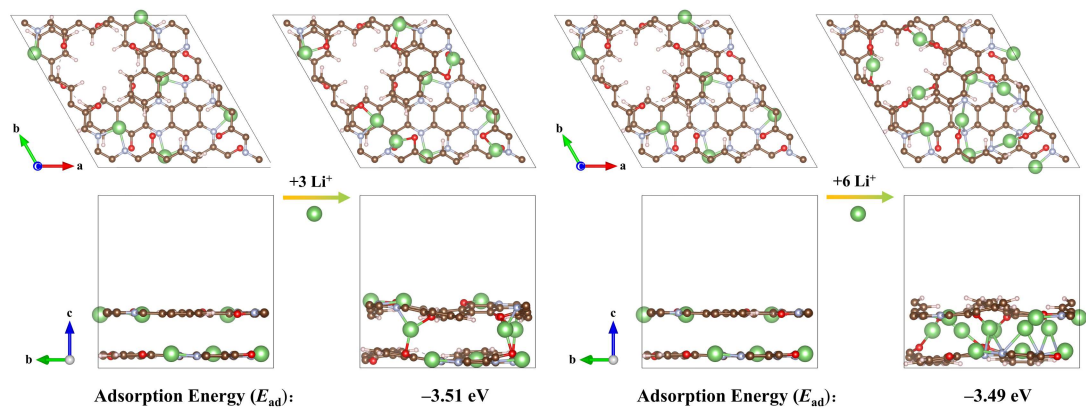

**Fig. S10** Average  $E_{ad}$  of individual  $\text{Li}^+$  corresponding to multiple  $\text{Li}^+$  adsorbed between redox sites and adsorbed on the C=O group of 3BQ-3 Li.

#### 4. Electrochemical measurements.

The electrodes were composed of 3BQ (active material), Ketjen black (conductive carbon), and polyvinylidene fluoride (PVDF) (binder) with a mass ratio of 5:4:1. The electrode slurry was prepared using N-methyl-2-pyrrolidinone (NMP) as the solvent and coated onto the aluminum foil current collector. The CR2032 coin cells were assembled with sodium as the counter electrode, 1 M NaPF<sub>6</sub> in Diethylene glycol dimethyl ether (DIGLYME) as the electrolyte, and glass microfibers (Whatman GF/D) as a separator in a glovebox with H<sub>2</sub>O and O<sub>2</sub> levels below 0.1 ppm. The cyclic voltammetry (CV) was implemented on a CHI instrument electrochemical workstation (CHI-660E).<sup>2, 3</sup> To evaluate the capacity contribution of conductive carbon, a pure Ketjen black electrode (Ketjen black: PVDF = 9:1) were also conducted.

Depending on the maximum possible number of adsorbed Na atoms of the above three stages, the maximum theoretical capacity ( $C_{\text{theo}}$ ) was calculated by

$$C_{\text{theo}} = \frac{xF}{M_{3\text{BQ}}}$$

where  $x$  represents the number of electrons involved in the electrochemical process,  $F$  is the Faraday constant, and  $M_{3\text{BQ}}$  is the molecule mass of 3BQ.<sup>4</sup>

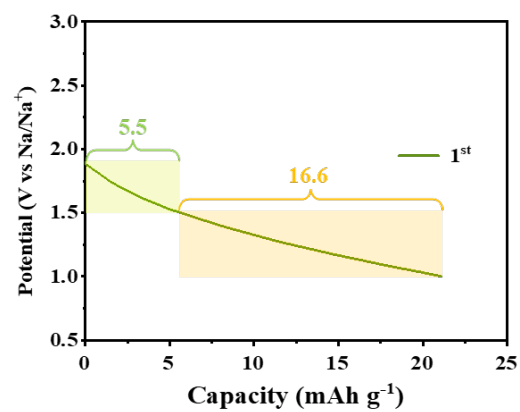

**Fig. S11** The 1st discharge curve of conductive carbon at the current density of 100 mA g<sup>-1</sup>.

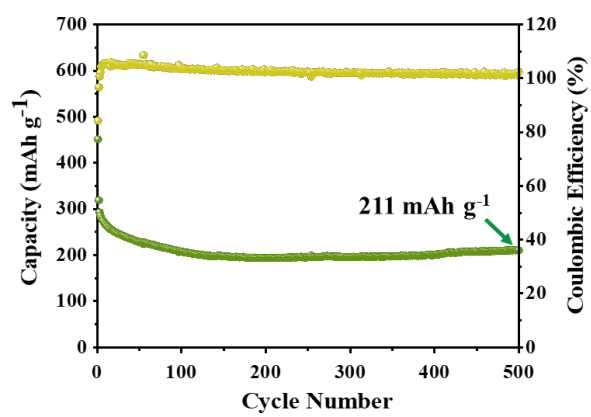

**Fig. S12** Cycling stability of 3BQ cathode in NIBs.

## References

1. Lee J, Kim H, Park M. J. Long-Life, High-Rate Lithium-Organic Batteries Based on Naphthoquinone Derivatives. *Chem Mat*, 2016, **28**, 2408–2416.
2. Nan T, Yang J, Chen B. Electrochemical mechanism of tin membrane electrodeposition under ultrasonic waves. *Ultrason Sonochem*, 2018, **42**, 731–737.
3. Hu Q, Yang J, Nan T, Xie X, Ye Y. Study on the electrically enhanced process for cadmium removal by a pulse in a sulfuric acid system. *Process Saf Environ Protect*, 2022, **159**, 944–952.
4. Wang X, Wang L, Li Y. Prediction of SiS<sub>2</sub> and SiSe<sub>2</sub> as promising anode materials for sodium-ion batteries. *Phys Chem Chem Phys*, 2022, **24**, 13189–13193.
